# Supplementary material for: Application of 16S rRNA gene sequencing in Helicobacter pylori detection
Source: PeerJ. 2020 May 13;8:e9099. doi: 10.7717/peerj.9099 (PMC7229771; doi:10.7717/peerj.9099)
Supplement: Supplemental Information 1 — Results presented in the table were used in correlation occurence using McNemar test. [file peerj-08-9099-s001.xlsx]

## Sheet: Arkusz1
	Histology				Histology				Histology				Histology				Histology
Inflammation	Positive	Negative		Focal Inflammation	Positive	Negative		Metaplasia	Positive	Negative		Atrophy	Positive	Negative		Activity	Positive	Negative
Positive	6	26		Positive	2	11		Positive	0	3		Positive	0	31		Positive	4	3
Negative	2	6		Negative	6	21		Negative	8	29		Negative	8	1		Negative	4	29
	PCR				PCR				PCR				PCR				PCR
Inflammation	Positive	Negative		Focal Inflammation	Positive	Negative		Metaplasia	Positive	Negative		Atrophy	Positive	Negative		Activity	Positive	Negative
Positive	8	24		Positive	4	9		Positive	1	2		Positive	0	1		Positive	4	3
Negative	5	3		Negative	9	18		Negative	12	25		Negative	13	26		Negative	9	24
	16S rRNA gene Sequencing				16S rRNA gene Sequencing				16S rRNA gene Sequencing				16S rRNA gene Sequencing				16S rRNA gene Sequencing
Inflammation	Positive	Negative		Focal Inflammation	Positive	Negative		Metaplasia	Positive	Negative		Atrophy	Positive	Negative		Activity	Positive	Negative
Positive	14	18		Positive	8	5		Positive	2	1		Positive	0	1		Positive	6	1
Negative	6	2		Negative	12	15		Negative	18	19		Negative	20	19		Negative	14	19

## Sheet: Arkusz2
	PCR				Histology				PCR
Histology	Positive	Negative		NGS	Positive	Negative		NGS	Positive	Negative
Positive	7	1		Positive	7	13		Positive	12	8
Negative	6	26		Negative	1	19		Negative	1	19
