# Supplementary material for: Application of 16S rRNA gene sequencing in Helicobacter pylori detection
Source: PeerJ. 2020 May 13;8:e9099. doi: 10.7717/peerj.9099 (PMC7229771; doi:10.7717/peerj.9099)
Supplement: Supplemental Information 10 — Results prepared by diagnostician according to Sydney Scale [file peerj-08-9099-s010.xls]

## Sheet: Arkusz2
Patient ID	Inflammation	Focal Inflammation	Metaplasis	Atrophy	Activity	H. pylori
E1	1	0	0	0	0	0
E2	1	0	0	0	0	0
E3	1	0	0	0	0	0
E4	0	1	0	0	0	0
E6	1	2	0	0	0	0
E9	1	0	0	0	0	0
E11	1	2	0	0	0	0
E13	0	0	0	0	0	0
E14	1	0	0	0	0	0
E15	1	0	0	0	0	0
E16	2	0	0	0	2	3
E17	0	0	2	0	0	0
E18	2	0	0	0	1	0
E19	1	0	0	0	0	0
E27	1	0	0	0	0	0
E29	1	2	0	0	0	0
E33	0	0	0	0	0	0
E35	1	2	0	0	0	0
E36	1	0	0	0	0	0
E37	2	0	0	0	1	3
E38	1	2	0	0	0	0
E39	2	0	0	0	2	0
E41	3	0	0	0	2	3
E42	0	0	0	0	0	2
E43	1	2	0	0	1	0
E45	1	2	0	0	0	0
E47	1	2	0	0	0	0
E48	2	0	0	0	2	2
E49	1	2	0	0	0	0
E52	1	0	0	0	0	0
E53	1	2	2	0	0	0
E54	0	0	0	0	0	0
E55	0	0	0	0	0	0
E56	1	0	0	0	0	0
E59	2	0	2	3	0	0
E60	0	0	0	0	0	2
E61	2	2	0	0	0	2
E62	2	2	0	0	0	3
E63	1	0	0	0	0	0
E64	1	0	0	0	0	0
